# Supplementary material for: Temperature-dependent NIR-CPL spectra of chiral Yb(iii) complexes
Source: Royal Society of Chemistry journal article supplement (doi:10.1039/d4cp01286k), 2024-01-01
Supplement: d4cp01286k2.zip [file d4cp01286k2.zip]

## Sheet: SS-4K
wavelength	Lum	CPL
921.03	0.000858274815601336	0.000181752954332381
922.05	0.000652137385514702	0.000187644289570885
923.071	-0.00039653668756705	0.000172327706679016
924.091	-0.00139505192881588	-0.0000715629169443472
925.111	-0.000390406304119458	-0.0000974837672679627
926.131	0.00106210503992952	0.0000238725169714563
927.151	0.00154921256636658	0.0000768921936948639
928.17	0.00282599389679322	0.0000533281494617705
929.19	0.00365173986626155	0.0000898530774530955
930.21	0.00384177631025292	0.000147585591487727
931.229	0.0028237889678192	0.000165258474432685
932.248	0.00216793466353032	0.000185288542996239
933.268	0.00203855570074892	0.000273654539088003
934.287	0.00269591371756788	0.000246554969445731
935.306	0.00316115636940734	0.00027011860252341
936.325	0.0027636503795281	0.000339634387954502
937.344	0.00212679320192929	0.000252446937231026
938.363	0.00251533955529704	0.000146407567970541
939.382	0.00240826103854019	0.000138159489896195
940.4	0.00247434911360994	0.000247733404118331
941.419	0.00266345876396971	0.000132268312794388
942.437	0.00268144882391482	0.0000521497780438491
943.455	0.00216857212106497	0.0000497936993821373
944.473	0.00240989451231774	0.000149941828286137
945.491	0.00324626270673552	0.000154654618156352
946.509	0.00352068084975886	0.000231238323299183
947.527	0.00314368875230148	0.000201782516858502
948.545	0.0029587405109284	0.000314890896973941
949.562	0.00265711688512501	0.000264227536117292
950.58	0.00263235925069188	0.000226524900882177
951.597	0.00163312687767	0.000172327184827913
952.615	0.00150230470087317	0.000136980786391208
953.632	0.00232403712688213	7.37699336955412E-06
954.649	0.00427963039963404	-0.0000574250059301262
955.666	0.00447934155199876	-0.0000244350498695372
956.683	0.00359683291694437	-0.0000668508228756029
957.7	0.00296892436547653	-0.0000479990466616214
958.717	0.00273118236157959	0.000290149256192746
959.733	0.00312124995591378	0.000345525470174289
960.75	0.00359141630754202	0.000154654586529012
961.766	0.00406744249265231	-0.0000550679942618971
962.783	0.00335598884676556	0.0000768921620675244
963.799	0.0030072191976483	0.000126377246388271
964.816	0.00246318526489029	0.000193535846200766
965.831	0.00334813539939684	0.000280723565756628
966.848	0.00401691770753749	0.000254802272650258
967.863	0.00499044511580126	0.000255980232912765
968.879	0.00431249516251937	0.000164079723486688
969.894	0.00471155526128703	0.000107525612497317
970.91	0.00555781716599837	0.000148763077340141
971.925	0.00671064526267636	0.000303109554845196
972.94	0.026219416475325	0.00133051609040901
973.956	0.119783935261807	0.00430433314884052
974.971	0.315883618132519	0.00923281562390575
975.986	0.591976883303476	0.014828174311823
977.001	0.864831395947069	0.0192394291265207
978.016	0.999996984198337	0.0192029042934113
979.03	0.925150832059697	0.0147610199817013
980.045	0.691231487740712	0.00841631473721069
981.059	0.434451210832217	0.00394144421727982
982.074	0.24098255610219	0.00278796810156894
983.088	0.163512464326586	0.00554970234155268
984.103	0.192457674057855	0.0112569764263365
985.116	0.284964228272515	0.0185689943635563
986.131	0.39921099152315	0.0268683466808237
987.144	0.520762646715128	0.0341061368334256
988.158	0.619232231480724	0.0372131117913499
989.172	0.671166252432515	0.0347859981249506
990.185	0.667919742792355	0.0268271346759892
991.198	0.618417345384069	0.0156482016468808
992.212	0.543740030584801	0.00474381132032847
993.225	0.464784991337803	-0.00299943432244073
994.239	0.398846783005456	-0.00701126272153257
995.251	0.34536160681393	-0.00847814347516689
996.265	0.304840165880833	-0.00829669742801956
997.277	0.27235330479501	-0.00753203849499045
998.29	0.245584814197547	-0.00689109148207972
999.302	0.220242580504818	-0.00633850334910935
1000.31	0.194014889783511	-0.00570579525815816
1001.33	0.169809838936983	-0.00475025900532017
1002.34	0.149697619371745	-0.00389605358574962
1003.35	0.139198285080932	-0.00319854898284217
1004.36	0.140516976721939	-0.00237026264246422
1005.38	0.152158537014492	-0.00152076985462719
1006.39	0.173558556100123	-0.000745503257390067
1007.4	0.201712461917294	-0.000170533189956061
1008.41	0.237134330369023	0.000571744915566299
1009.42	0.279834779205024	0.00148721738148219
1010.43	0.335622188018547	0.00253347460211677
1011.45	0.398920004311823	0.00333348499395692
1012.46	0.46351822515729	0.00392141826027041
1013.47	0.51714275708283	0.0045694324022094
1014.48	0.544419907865042	0.00507959404050559
1015.49	0.529866400459726	0.00498415696196812
1016.5	0.479304037399329	0.00420889338197919
1017.51	0.405895213777095	0.00332876777625916
1018.52	0.32941176092894	0.00261359139736364
1019.53	0.258991156122714	0.00223185099004868
1020.54	0.202295687144616	0.00192080243078696
1021.55	0.155855834843162	0.00144715803503857
1022.56	0.120583822055551	0.000975871773728976
1023.57	0.0943092226033819	0.000676604398459297
1024.58	0.0743638185742847	0.000431534897380579
1025.59	0.0589619077848437	0.000225347098756368
1026.6	0.0486768487196575	0.0000191599200280128
1027.61	0.0436917410839141	0.0000120906782934791
1028.62	0.0402117559476342	2.66452293546892E-06
1029.63	0.0367905072991382	0.0000922086500773739
1030.64	0.0337394114784652	0.0000215155527442365
1031.65	0.0329775702691712	-0.0000527119788548644
1032.66	0.0326560268086885	-0.000104553205092002
1033.67	0.032430156050423	-0.000108087892376682
1034.68	0.0310306664041974	-0.000273038510804125
1035.68	0.0290237750050265	-0.000257721406061154
1036.69	0.025574156025573	-0.000203523215596797
1037.7	0.0219796347381143	-0.000169354919745626
1038.71	0.019443725688177	-0.000249474260993324
1039.72	0.0175818178355604	-0.0000138311777795349
1040.73	0.0156596864028419	0.000187643672837763
1041.73	0.0136001580742339	0.000240663744902915
1042.74	0.0124236411720188	0.000207674057674713
1043.75	0.0109139263365375	0.000353773390111938
1044.76	0.00913842889383382	0.000312535925269115
1045.77	0.00894778134811537	0.000115773785453683
1046.77	0.00937585623194138	-0.0000586028396832748
1047.78	0.00932030260812599	0.0000403672498898691
1048.79	0.00801390638420442	0.000250089640916741
1049.8	0.00687997343563274	0.000288970868961155
1050.8	0.00702746863550624	0.000172327184827913
1051.81	0.00647209009160635	-0.0000315040449108222
1052.82	0.00539542521862402	-0.0000845235318701924
1053.82	0.0040678438916312	-0.0000468202166472761
1054.83	0.00349360189876996	1.48657532389781E-06
1055.84	0.00269085237747233	0.0000391892105590132
1056.84	0.00174291208017533	0.000154653985609561
1057.85	0.00261040627271806	0.000145228295173442
1058.85	0.00374331900995136	0.000253624850052524
1059.86	0.00423559608950542	0.000175862994883148
1060.87	0.00353879815578727	0.000316070786504162
1061.87	0.00296439932983928	0.000103991415436401
1062.88	0.00221494578656065	9.73402085145319E-06
1063.88	0.00157684046232395	-0.000151681641458924
1064.89	0.00165466775852528	0.0000698228349391739
1065.89	0.000607779070269197	0.000169971106166202
1066.9	-0.000171155671685602	0.00021592136087924
1067.9	-0.000258945287300477	0.00019117929312896
1068.91	0.000746579651534505	0.000214743716890129
1069.91	-1.56231263623175E-06	0.000151119946685342

## Sheet: SS-30K
wavelength	Lum	CPL
921.03	-5.52279935421943E-07	-0.0000315415646561318
922.05	0.000495104865582596	0.0000642229456933007
923.071	0.000233189764814735	0.0000946935811261963
924.091	0.000790609652375935	0.0000758308635655464
925.111	0.00116553817730361	0.000212224321166259
926.131	0.000805156219257752	0.0000975962441575784
927.151	0.000192452050592603	0.000100498058090363
928.17	0.000676736998901075	0.000080183685733363
929.19	0.00181592466197419	0.0000308500639884264
930.21	0.0020527364069525	-0.0000866802359225462
931.229	0.00267252465098489	-0.000134562931226352
932.248	0.00281518180220623	-0.0000982878811484532
933.268	0.00296298092926498	0.000151283171043846
934.287	0.00262753325075117	0.000305087858891609
935.306	0.00266239857194525	0.000167243322946806
936.325	0.00286474664408526	-3.97370910304923E-06
937.344	0.00311800724682843	0.0000903414756287558
938.363	0.00333621332030383	0.000245597401513465
939.382	0.00345622582771814	0.000215125862452704
940.4	0.00386182638377756	0.000200615624304474
941.419	0.00379920842328346	0.0000787328371911862
942.437	0.00333555487466616	0.0000206932673046961
943.455	0.00337033028391387	-0.0000765234197640775
944.473	0.00396013573990096	0.000133869346761629
945.491	0.00445687976699868	0.000244144449699533
946.509	0.00423152831223572	0.000249948837079902
947.527	0.00374911030950926	-0.0000184833435343869
948.545	0.00308127973337694	-0.000112797612953483
949.562	0.00327882799155634	0.0000540658997329179
950.58	0.0038176113276625	0.000164341002670821
951.597	0.00335774805679671	0.000265910332739818
952.615	0.00342287793196364	0.000152733474293345
953.632	0.00343557003783666	0.000064223378032495
954.649	0.00401234879131429	-0.000114248383596706
955.666	0.00377299689711776	0.000101949296127309
956.683	0.00323206476699868	0.0000830867265746716
957.7	0.00289547828566661	0.000157086662586245
958.717	0.00394258673148509	3.79070220342725E-07
959.733	0.00368336246031327	0.000197713732472735
960.75	0.00322717495858837	0.000080184211551302
961.766	0.00368962885345261	0.0000032817994658357
962.783	0.00543047006305644	-0.000138915535277098
963.799	0.00524413695591755	-0.0000126796961940797
964.816	0.00517078192863901	-0.000063464166481193
965.831	0.00544629801140665	-0.0000518562486089473
966.848	0.00540258716567439	-0.000021385878032495
967.863	0.00687108484374306	0.000154183758068106
968.879	0.00935994430966227	-0.000130209937680837
969.894	0.0135081807608641	-0.000426211161807256
970.91	0.0164156079988733	-0.000671427915646561
971.925	0.0222737412468006	-0.000952919680614289
972.94	0.0371212746727827	-0.000722212775428444
973.956	0.110959872620785	0.000901446806142889
974.971	0.273987352630342	0.00378310983752504
975.986	0.526579865203372	0.00783136267527264
977.001	0.810156547596122	0.0120174713443134
978.016	1.0000057798014	0.0133349763521033
979.03	0.996010425339097	0.0109364889828622
980.045	0.819155632685191	0.00710732111061651
981.059	0.566929697319261	0.00379036261963054
982.074	0.340244752205973	0.00238726107277988
983.088	0.216961338540466	0.00420390090140218
984.103	0.222658446912085	0.00929108001335411
985.116	0.302702311993573	0.0160787780992655
986.131	0.40741749098787	0.0237559614956599
987.144	0.524448211468354	0.0308875639884264
988.158	0.623352411629479	0.0347095008902738
989.172	0.680851092093298	0.0336560538615624
990.185	0.685709435012102	0.0274545317716448
991.198	0.642149404906201	0.0177662700311596
992.212	0.569468793428709	0.00725242349209882
993.225	0.488638689584173	-0.00138966503449811
994.239	0.419107297182506	-0.00625193272868907
995.251	0.363009296255898	-0.00765358808146005
996.265	0.320286426290841	-0.00722699393501002
997.277	0.286948010565143	-0.00659435705541954
998.29	0.257842314739915	-0.00607200756732695
999.302	0.231462589832406	-0.00564106665924772
1000.31	0.205263200837748	-0.00520432227910082
1001.33	0.183688754506037	-0.00467906521255286
1002.34	0.167289044076897	-0.00398984253282884
1003.35	0.159178625452092	-0.00314246355441798
1004.36	0.160519567148481	-0.00261865930336078
1005.38	0.173640311643529	-0.00232556020476296
1006.39	0.195377286057478	-0.00180320039505898
1007.4	0.223909700728912	-0.00144625550856888
1008.41	0.256990301467561	-0.00100370444302248
1009.42	0.291756858137659	-0.000685938095370577
1010.43	0.329051366493295	0.0000642236896283107
1011.45	0.372666630240513	0.000498069722345871
1012.46	0.425553727067104	0.00149924980525262
1013.47	0.497559183136267	0.00277321591920766
1014.48	0.558697735132428	0.00411683285110171
1015.49	0.578612995341364	0.00448248859336746
1016.5	0.538236969104719	0.00429821472290229
1017.51	0.465095390898342	0.00371636211885155
1018.52	0.38130697316381	0.00303729551524594
1019.53	0.305014521376308	0.00229148898286223
1020.54	0.24063490622357	0.00181266728800356
1021.55	0.185376006628366	0.00152537010349432
1022.56	0.142506101023815	0.00121485805697752
1023.57	0.110976752953205	0.000841952843311819
1024.58	0.0874753094007345	0.000553206348764745
1025.59	0.0693654471970287	0.000283321917427109
1026.6	0.0572899718172713	0.000280419791898509
1027.61	0.0493392460480191	0.000233988509904296
1028.62	0.0441155400873581	0.000167243712441576
1029.63	0.0404816683132094	-0.0000663655130202538
1030.64	0.0382282772868907	-0.000173738996772758
1031.65	0.0368989626015468	-0.000272406590807924
1032.66	0.0357382435093479	-0.000249190696639217
1033.67	0.0325585504576564	-0.000183896358223904
1034.68	0.029202202181588	-0.000243387321945248
1035.68	0.0265557573165201	-0.000259348291787225
1036.69	0.0251744257330848	-0.000176641414422435
1037.7	0.0234831591225239	-0.0000460519391275318
1038.71	0.0206584627323058	-0.000149072254061874
1039.72	0.0179140300856889	-0.000260798633986201
1040.73	0.0159312072937069	-0.000221621964722902
1041.73	0.0146189211199366	0.0000148895225906966
1042.74	0.012663919382929	0.00023253803138215
1043.75	0.0114023489664478	0.00030653853216114
1044.76	0.010071921438905	0.000307989400178055
1045.77	0.00826311934578791	0.000283322112174494
1046.77	0.0065684327713944	0.000300733696861785
1047.78	0.00647340766470064	0.000287674910972624
1048.79	0.0071045036181282	0.000245596817271311
1049.8	0.00600374737410973	0.0000975962052081015
1050.8	0.0035345226292288	-0.0000184831682617405
1051.81	0.00204148951007121	-0.0000126795014466949
1052.82	0.00269248599251614	-0.0000387974042955709
1053.82	0.00410805425898621	-0.0000271894669485867
1054.83	0.00413752837330292	-0.000127307851101714
1055.84	0.00329258672977409	-0.0000794254673937236
1056.84	0.00219187967908414	0.0000888889522590696
1057.85	0.00229564448489318	0.000248497384820832
1058.85	0.00210482503714112	0.000332654545960383
1059.86	0.00209562788504342	0.000325399816381037
1060.87	0.000825719626780558	0.000231086014355664
1061.87	0.000290336413170494	0.000139674259959938
1062.88	-0.000415074164951037	0.0000352031938571111
1063.88	-0.0000827186739094174	0.0000177913754729579
1064.89	-0.000198044676023819	0.000193361225795682
1065.89	0.000314034830152461	0.000338460160249277
1066.9	0.000921778046822833	0.00037618545515246
1067.9	0.000429100152598473	0.000128066030491876
1068.91	-0.000321380534581592	-0.0000300918066993101
1069.91	-5.62306643676699E-07	-0.000394289923213888

## Sheet: SS-80K
wavelength	Lum	CPL
921.03	-4.13132195621508E-06	-0.000093933345819516
922.05	0.00208824170153249	-0.0000100426564720659
923.071	0.00221998565653816	0.0000324772747804818
924.091	0.00162801304780371	3.74751396432621E-06
925.111	0.00159088147134972	0.0000485658223803805
926.131	0.00165731176209416	0.000115219253693523
927.151	0.00139312912057246	0.0000520138662729847
928.17	0.00181102717642976	-0.000185868555752641
929.19	0.00186017426928288	-0.000188167102581335
930.21	0.00152922727507794	-0.0000364738550354204
931.229	0.00151427259786045	0.000174977059944694
932.248	0.0024047130532352	0.0000761466414005089
933.268	0.00261505591081559	0.000104876957484548
934.287	0.00288081999702533	0.0000945345841550343
935.306	0.00302684074013682	0.000103728031112629
936.325	0.00289489702479977	0.000147396780768341
937.344	0.00247650559167981	0.000179574230722619
938.363	0.0031964133201494	0.000295642601385966
939.382	0.00380682372004141	0.000106026099793978
940.4	0.00440655202907443	0.000050865248383223
941.419	0.00416325189514912	-0.000164033216918043
942.437	0.00443291813291174	-4.29583438915026E-06
943.455	0.00381593234931197	0.000133606641180165
944.473	0.00349806408639704	0.00030713433296242
945.491	0.00322900210770435	0.0000841913316513711
946.509	0.00364047380314432	0.000188767909041832
947.527	0.0043097484445889	0.000180723715447244
948.545	0.00533202864947613	0.000115219710247116
949.562	0.00565097414746548	-0.000138751728271288
950.58	0.00569692216088446	-0.000138751685083786
951.597	0.00565417232907334	-0.0000870382297531041
952.615	0.00768707595411328	0.000153143263520883
953.632	0.00919710693445855	0.000338163319268016
954.649	0.010489671831062	0.000355401147994315
955.666	0.0096072171721	0.000224392631683321
956.683	0.00969559993202376	0.000177275838135005
957.7	0.0102497907499422	0.000226690823757533
958.717	0.0118497499195412	0.00049904910374916
959.733	0.0143504816018267	0.000593282690845792
960.75	0.0170313540546344	0.000478363832670464
961.766	0.0198485002928708	0.000272658829750901
962.783	0.0225358729054282	0.000325521566207983
963.799	0.0252193802660989	0.000471469256447828
964.816	0.028916605093415	0.000570300153139357
965.831	0.0354726837039453	0.000433546619366069
966.848	0.0452974797408089	0.000110623190366543
967.863	0.0581217092869986	-0.000238731255191865
968.879	0.0741112091769806	-0.000738629423468882
969.894	0.0943631520548548	-0.00157638831293311
970.91	0.116018587802582	-0.00275086317714588
971.925	0.141201521635066	-0.00408622274615224
972.94	0.176944350583615	-0.00458612270979541
973.956	0.261811966969681	-0.00312435054590325
974.971	0.417608229434817	0.000587533046151134
975.986	0.637707391147223	0.00510730302863375
977.001	0.861824092273734	0.00893756695715403
978.016	1.00000384776997	0.00982704903764584
979.03	0.989587422040202	0.00774126543787941
980.045	0.859855174892053	0.00424312095805744
981.059	0.682447662093195	0.00191485788888032
982.074	0.532407042959633	0.00199070177487413
983.088	0.454813890005211	0.00559456879702976
984.103	0.465361604252471	0.0122139143080635
985.116	0.529444849930107	0.0207167699714654
986.131	0.614980734503333	0.0296678131920191
987.144	0.700637253022167	0.0373949673339429
988.158	0.763932129504996	0.0410850000550861
989.172	0.790704811798308	0.0393198497251204
990.185	0.76849715624456	0.0321868322187579
991.198	0.701550443544493	0.0215660244361938
992.212	0.611983941508445	0.0105866396157194
993.225	0.525801259172089	0.00210906391089272
994.239	0.456281483985854	-0.0027876413454229
995.251	0.402754410787577	-0.00502396377538092
996.265	0.362507953613141	-0.00568014851212445
997.277	0.330984816382529	-0.00572611698084105
998.29	0.306643827876618	-0.0056284361056331
999.302	0.285439061153591	-0.00546640122511485
1000.31	0.266158042960283	-0.00545720999922879
1001.33	0.251082930966871	-0.00567671356329944
1002.34	0.245207877085284	-0.00560891072746703
1003.35	0.249731454421761	-0.00515612832857757
1004.36	0.268359028147124	-0.00438156819108266
1005.38	0.294763060424714	-0.00394142893342294
1006.39	0.329068027916534	-0.00357598708781826
1007.4	0.364331742086882	-0.00347371291328346
1008.41	0.40034616962222	-0.00314159639516564
1009.42	0.430295837938899	-0.0023520984719116
1010.43	0.458806518960966	-0.00162695547941432
1011.45	0.490445934142034	-0.000553610937895932
1012.46	0.526958311815968	0.00089782167527846
1013.47	0.562524558845175	0.00269056280366212
1014.48	0.583606907541287	0.00368806284222239
1015.49	0.577713042415195	0.0039684623266165
1016.5	0.541361852490443	0.00386503442881223
1017.51	0.478357253286988	0.00341454867958619
1018.52	0.405375019039959	0.00307553604283495
1019.53	0.331859000488063	0.00251013297784437
1020.54	0.267973244035828	0.00197346116980841
1021.55	0.211081549302059	0.00151033767779039
1022.56	0.166683932812586	0.00114259656042394
1023.57	0.132254917246356	0.000812778542862494
1024.58	0.107579005781837	0.000463423424812983
1025.59	0.0885010539281898	0.00030138761884826
1026.6	0.0748537101149096	0.0000393724371192173
1027.61	0.0642562632906233	-0.0000548606872541783
1028.62	0.0575101060319279	0.0000301795145812905
1029.63	0.0530914466524178	-0.0000111915057234458
1030.64	0.0502569533244461	-0.000272058162107374
1031.65	0.0464883099199048	-0.000463972979166437
1032.66	0.0431649825443168	-0.000453630220234226
1033.67	0.0406015128262475	-0.000332965138431368
1034.68	0.0380842334611698	-0.000198509836834973
1035.68	0.0346397909926515	-0.000167481627904415
1036.69	0.0312359559410359	-0.000175525966485617
1037.7	0.0282278312272081	-0.000119215417497549
1038.71	0.0254257285257858	-0.000213449282228123
1039.72	0.0223555768638382	-0.000177824143135721
1040.73	0.0196377840963125	-0.000158287767580729
1041.73	0.0175130944013794	-0.0001490940584133
1042.74	0.0163472974032413	-0.000226090449172056
1043.75	0.0151234114546036	-0.000219195441074399
1044.76	0.0134602689479657	-0.0000249817532803773
1045.77	0.0123106672631022	0.0000887885178534049
1046.77	0.0114163806882457	0.000238183635021539
1047.78	0.00980570834995099	0.0000485668712197163
1048.79	0.00903121480163497	-0.000234134414489848
1049.8	0.00895788533024119	-0.000337561957539634
1050.8	0.00862999403120078	-0.000181271708880981
1051.81	0.00743048434012362	-0.0000192354864653454
1052.82	0.00662131475062524	0.0000807442132052397
1053.82	0.00673906999713554	0.000180723588969559
1054.83	0.00640242896977978	0.000178425242654269
1055.84	0.00588863104619521	-0.0000904855949849615
1056.84	0.00571476048156269	-0.000191614683750702
1057.85	0.00588626183822315	-0.000123812464882612
1058.85	0.00525297320314653	0.0000232841671532605
1059.86	0.00343032955369244	0.0000313287648594753
1060.87	0.00274521386043388	0.0000370747077682417
1061.87	0.00326399591184023	-0.0000456669935108575
1062.88	0.00416792204843172	-0.000309981292760585
1063.88	0.0040239081497681	-0.000345606200491368
1064.89	0.00318259647966772	-0.000135304042217987
1065.89	0.00270795581136316	0.000151994028666806
1066.9	0.00110546441735433	0.0000301795145812905
1067.9	-0.0011822801323168	2.59858759240689E-06
1068.91	-0.00216968013848645	0.0000899371357431665
1069.91	-4.12602487688213E-06	0.000216349113664658

## Sheet: SS-150K
wavelength	Lum	CPL
921.03	-0.00175803630614413	0.000115876217513733
922.05	-0.00192539248511288	0.000227826293680469
923.071	-0.000385948434889004	0.000160415385680654
924.091	0.0000882270299588922	0.000142359114619397
925.111	0.000222387718690846	0.0000869859899367585
926.131	-2.93550523934766E-06	0.0000954124544153626
927.151	0.000200548910815664	-8.88826570650425E-07
928.17	0.000135745769053201	-0.0000394092323316254
929.19	0.00117129407284307	0.0000725405691732447
930.21	0.00251220174514146	0.00015800789364354
931.229	0.00337579078844109	0.000177268637769469
932.248	0.00403107534944373	0.000189306421086645
933.268	0.00487386456654201	0.000219400152333472
934.287	0.00627973768868575	0.00028681025250427
935.306	0.00824136301066331	0.000378296242441029
936.325	0.0109906216244287	0.000399964478604072
937.344	0.0127378260444075	0.000242271407468956
938.363	0.0149450313876194	0.000160415385680654
939.382	0.0161302988600378	0.000263938674237179
940.4	0.0176488805841758	0.000338572543045746
941.419	0.0196571762569819	0.000291626367539122
942.437	0.0223775425864377	0.000247087684069612
943.455	0.0241079379933527	0.000326535567557587
944.473	0.0256678814776347	0.000313293472741541
945.491	0.0276805554239948	0.0000135557863638461
946.509	0.0307357904191478	-0.000197102917416794
947.527	0.033019779511148	-0.0000755225499699949
948.545	0.0366380371672898	0.000292830355906384
949.562	0.0402787103076674	0.000424041014633246
950.58	0.044722188842958	0.000504693532751696
951.597	0.0488494058599917	0.000670812422102202
952.615	0.0534878019967225	0.00100666394312884
953.632	0.0590124136453861	0.00109213112218991
954.649	0.0633342491275447	0.00109333414116235
955.666	0.0659340239532844	0.00122574830355906
956.683	0.0681789310321747	0.00141353769099386
957.7	0.0718635048238933	0.00136057205834834
958.717	0.0773149973205465	0.00116555971010479
959.733	0.0816124754440751	0.00115592748003508
960.75	0.0869373354293034	0.00112824107925957
961.766	0.0928822077272307	0.00119565538014125
962.783	0.101926658720168	0.00123658468356183
963.799	0.112375062384942	0.00122815741125421
964.816	0.123783417726538	0.000947678207081199
965.831	0.137318182769699	0.000395150625490468
966.848	0.153824135854221	-0.000369240617642986
967.863	0.173008592071504	-0.00124919600240041
968.879	0.194866289906984	-0.00211710940312976
969.894	0.221524976835849	-0.00325586945483082
970.91	0.252561574177399	-0.00447527927803167
971.925	0.291911913227623	-0.00546838711166505
972.94	0.348614765780132	-0.00527337880256659
973.956	0.444821468831879	-0.00335096854082999
974.971	0.587013634960532	0.000117081336841619
975.986	0.760114574569543	0.00396070481927711
977.001	0.91325452077967	0.00630684692794165
978.016	0.99999735024258	0.00642722314545538
979.03	0.995634981285833	0.00464685362138208
980.045	0.92359067415201	0.0025222044961455
981.059	0.822760133658542	0.00154233891889397
982.074	0.737078403268476	0.00291463652310391
983.088	0.691140652324009	0.00727588630383603
984.103	0.694070345093477	0.0142348598993676
985.116	0.73060085092508	0.0227527253842958
986.131	0.780100467523427	0.0311887319392513
987.144	0.825931128453815	0.0375722614596316
988.158	0.85427546123344	0.0400784702026497
989.172	0.858003743604533	0.0377467686839311
990.185	0.830917496434012	0.031354805428611
991.198	0.776755705709966	0.0220376464478604
992.212	0.708281696611965	0.0125904964686332
993.225	0.639966544861977	0.00494898878271708
994.239	0.579254815222268	0.0000893928357106589
995.251	0.528168802859253	-0.0028285353367493
996.265	0.486506685918848	-0.00435129852744311
997.277	0.452514647608595	-0.00506753589068919
998.29	0.425254037686609	-0.00541180999861515
999.302	0.404799277658681	-0.00554662858329871
1000.31	0.38865232482297	-0.005686266675899
1001.33	0.379267661614273	-0.00612685339057379
1002.34	0.379979238378803	-0.00656382749388358
1003.35	0.391469105271661	-0.00669744402898952
1004.36	0.411273374645709	-0.00641214467063657
1005.38	0.437770121222822	-0.00620870424225638
1006.39	0.469173084221945	-0.00607749180630568
1007.4	0.501157919494068	-0.00585359068457739
1008.41	0.527061764137008	-0.00557552301158658
1009.42	0.54602393403499	-0.00534680722891566
1010.43	0.559011626757605	-0.00462574874209482
1011.45	0.570269371349767	-0.00345207819784887
1012.46	0.579104592115589	-0.00201237841019249
1013.47	0.588081418340027	-0.000441465540322209
1014.48	0.59419587554817	0.00104157395097632
1015.49	0.590804031689978	0.00197930526704519
1016.5	0.569684264644786	0.0023007097354937
1017.51	0.530047440866916	0.0022934893597378
1018.52	0.478887743987444	0.00209968633153303
1019.53	0.422801097931958	0.00188782509347736
1020.54	0.36636431569958	0.0016567005262429
1021.55	0.311909715067165	0.0014087212528274
1022.56	0.26320501057102	0.00110055532474727
1023.57	0.220049629806583	0.000756279278031667
1024.58	0.186025255827909	0.000214585329825047
1025.59	0.159501574274108	-0.000191083831879241
1026.6	0.140086326455246	-0.000251272118358491
1027.61	0.12338411468864	-0.000280162976042099
1028.62	0.110570676406777	-0.000329517551585653
1029.63	0.100563751534875	-0.000434245093477358
1030.64	0.0920180739509763	-0.000324701969717952
1031.65	0.0848514759036144	-0.000353592549508378
1032.66	0.0792098282324701	-0.000449894153625998
1033.67	0.074326847412639	-0.000540176752988967
1034.68	0.0685529511632737	-0.000337944190555325
1035.68	0.0642540752873563	-0.000118858650694733
1036.69	0.0598652595900844	-0.000109228294788349
1037.7	0.0564682225453538	-0.000187472771545954
1038.71	0.0528282597747311	-0.000250068792411024
1039.72	0.0496312181138346	-0.000305442110972626
1040.73	0.0453820414323962	-0.000368037905645571
1041.73	0.042664086943175	-0.000198307051193279
1042.74	0.0404064395974703	-0.000111635932234686
1043.75	0.0379247882333933	-0.0000622812306698057
1044.76	0.0355099558694548	-0.000181453653695241
1045.77	0.0333742907053501	-0.000282570128791026
1046.77	0.0309908928334026	-0.000380075381987721
1047.78	0.0292471401467941	-0.000331924749573005
1048.79	0.0282245433919586	-0.000433040610718737
1049.8	0.0192330791672437	-0.000483597103355953
1050.01	0.00767026323685546	-0.000316273854036837
1051.02	-0.0000312134515071916	0.00018930803674468
1052.03	0.000506227602363453	0.000308480589022758
1053.03	0.000349206501869517	0.0000893973595531552
1054.04	-0.000387755848682115	-0.000263307251996492
1055.04	-0.00092445658726864	-0.000342755620181877
1056.05	-0.000890177606979656	-0.000247659603932973
1057.06	-0.0014133006485713	-0.000029780039699026
1058.06	-0.00109024050454692	0.0000460573327793934
1059.07	0.0000057566126575287	-0.000122462262844481
	--	--
	--	--
	--	--
	--	--
	--	--
	--	--
	--	--
	--	--
	--	--
	--	--

## Sheet: SS-300K
wavelength	Lum	CPL
921.03	0.00101678705900767	0.000381133923496128
922.05	0.00257440645628545	0.000239702036452765
923.071	0.00353238868204226	0.000212503848661052
924.091	0.00384062735913021	0.000397453573570441
925.111	0.00364679452556656	0.000343056686918203
926.131	0.00403690995932318	0.00026146071810383
927.151	0.00643232005280184	0.000277779145263487
928.17	0.0113278392742041	0.000413771635680947
929.19	0.0166209573805116	0.000386573648666267
930.21	0.0218670102212459	0.000364815076529947
931.229	0.0280898756786003	0.000141787567468906
932.248	0.0337765100076921	0.00012002881280801
933.268	0.0381661329116581	0.0000547526035826967
934.287	0.0433195347305155	-0.0000540411514693229
935.306	0.0503748440744701	-0.00026074939375766
936.325	0.0553474176357853	-0.000124757523923757
937.344	0.0586318996219134	0.0000275539594795442
938.363	0.0623550924630388	0.00014178738494433
939.382	0.0672972901670101	-0.0000758000156449636
940.4	0.0718113813070064	3.55187609188756E-07
941.419	0.075180870489557	0.000136347568511903
942.437	0.0797050019282418	0.000348495189173685
943.455	0.0850982125433496	0.000370253578785429
944.473	0.091100924866366	0.000647677061875831
945.491	0.0965153865570651	0.000843506401397617
946.509	0.1029475531316	0.00100125764647597
947.527	0.109923512566817	0.00118620870381476
948.545	0.117042103367448	0.00139835610544706
949.562	0.125336587499804	0.00161050241193189
950.58	0.135064107806706	0.00174105475737269
951.597	0.14292431382376	0.00197496310396078
952.615	0.149366261394618	0.00221430757998488
953.632	0.156293377153138	0.00239925608197961
954.649	0.163621005427499	0.00242645589424005
955.666	0.171406900761388	0.00239925973247112
956.683	0.179244163725848	0.002306783656228
957.7	0.188669129748898	0.00211095486427994
958.717	0.197573380679643	0.00183353211128784
959.733	0.208516996559542	0.00177369873015045
960.75	0.221790235404422	0.00151259385674428
961.766	0.238379075659175	0.00159418544496884
962.783	0.25588310379247	0.00128955977679852
963.799	0.27267376407799	0.00099581786654846
964.816	0.290595383812417	0.000381134598837058
965.831	0.31092250313838	0.000196185001694871
966.848	0.331412114724258	-0.000255309431305572
967.863	0.353958603962217	-0.000842795442100597
968.879	0.379468599388412	-0.00178386021225001
969.894	0.413360426570494	-0.00258349435477562
970.91	0.453154925660217	-0.00338312794972752
971.925	0.505168576406091	-0.00349736095538578
972.94	0.572807113074105	-0.00331784986049907
973.956	0.655683539623347	-0.00202864501577534
974.971	0.748821802504498	0.000147231362937081
975.986	0.842275834348517	0.00252981317305937
977.001	0.92559610175354	0.00392781179108758
978.016	0.980795852235796	0.00379181455503116
979.03	0.999994108237204	0.00259508323120649
980.045	0.985339358328205	0.00094685838700425
981.059	0.951952675214597	0.000294098850095174
982.074	0.915536823900159	0.00126236379755417
983.088	0.88698182705288	0.00425419384109932
984.103	0.87045659281479	0.00888881698000052
985.116	0.867259911022138	0.0144264045266095
986.131	0.869611109093374	0.0199476908033689
987.144	0.872205151284321	0.024446324737295
988.158	0.86521817525749	0.0267473025475216
989.172	0.848898848053375	0.0263338478788037
990.185	0.819232847767985	0.0238587598758833
991.198	0.783505727824698	0.0196484727908008
992.212	0.743468767586112	0.014437275690334
993.225	0.703106695347058	0.00900849104325832
994.239	0.66057058399103	0.00463497350786159
995.251	0.62027491786029	0.00149083236421475
996.265	0.586120857963026	-0.00015739558290527
997.277	0.556695835505072	-0.00141396302573596
998.29	0.53307192451292	-0.00234958819848244
999.302	0.513003641982738	-0.0032580201298532
1000.31	0.498522863095095	-0.00374759667283774
1001.33	0.487883702131626	-0.00417189330134807
1002.34	0.484461999400276	-0.00512926938019869
1003.35	0.487353314711481	-0.00592345571171547
1004.36	0.496128164873145	-0.00665237125498683
1005.38	0.510064892126672	-0.00670676722901619
1006.39	0.52517334506271	-0.0070168381528513
1007.4	0.540802789757764	-0.00679925425673385
1008.41	0.553261391450027	-0.00647287293682042
1009.42	0.562599214023102	-0.00609208651664885
1010.43	0.567069482817919	-0.00581466376365675
1011.45	0.571071527794582	-0.00531965528930145
1012.46	0.573940143438242	-0.00438403066412871
1013.47	0.572840428528591	-0.00314378201350682
1014.48	0.567474723162369	-0.00201776673359234
1015.49	0.559320303029908	-0.00116917679851894
1016.5	0.545192766159944	-0.000668725970639618
1017.51	0.523235576868921	0.000353932742301374
1018.52	0.495531862063571	0.000848943169669631
1019.53	0.466064699108237	0.00129499846157858
1020.54	0.431450864618915	0.00119164665849652
1021.55	0.392739092657297	0.00111549083465881
1022.56	0.351471846262157	0.000712954238481396
1023.57	0.313689385139892	0.000386573648666267
1024.58	0.277817304450992	0.000326736982086517
1025.59	0.244117135837397	0.000174425334411097
1026.6	0.214295092957159	0.0000166743996245208
1027.61	0.191211466285103	-0.000271628844097938
1028.62	0.170231435347188	-0.000445698863132643
1029.63	0.150770921501395	-0.000380422489635212
1030.64	0.133700306224088	0.0000765113764960496
1031.65	0.119832997249094	0.000381133923496128
1032.66	0.107585724257516	0.000386573283617116
1033.67	0.096343770553571	0.0000547522385335454
1034.68	0.0860102822077651	-0.000282508075408725
1035.68	0.0777494086999035	-0.000565371539203671
1036.69	0.0722614263382963	-0.000717683241636463
1037.7	0.0676770565304686	-0.000717683606685614
1038.71	0.062050992894579	-0.000576251664884879
1039.72	0.0555638043858048	-0.000277068258976298
1040.73	0.0487152316875701	-0.0000703599254256734
1041.73	0.042713360552528	-0.000168274394409533
1042.74	0.0376622638001617	-0.000157395601157727
1043.75	0.0332774976532555	-0.000271629190894631
1044.76	0.0290618274882012	-0.000320586242861985
1045.77	0.0255160369859978	-0.000391301921723032
1046.77	0.0230977751440641	-0.00016283499778363
1047.78	0.0201741326953665	-0.0000975586790435713
1048.79	0.0171901122917264	-0.000119317415452009
1049.8	0.0146937077247008	-0.000179154063779302
1050.8	0.0143056406625643	-0.000228111389533519
1051.81	0.0130421896039217	-0.000304266976089281
1052.82	0.0108340434916951	-0.000146516187322365
1053.82	0.00809844963755839	0.000201623284920863
1054.83	0.00647412141795527	0.000419210685510156
1055.84	0.00456792310370011	0.000299537717399807
1056.84	0.0016925675745092	0.000234261635941696
1057.85	-0.00014360505723442	0.000207062918828714
1058.85	-0.000508335048629695	0.0000873900419806523
1059.86	1.57051967357851E-06	-0.000206352507105421
	--	--
	--	--
	--	--
	--	--
	--	--
	--	--
	--	--
	--	--
	--	--
	--	--
